# Supplementary material for: A facile access to highly functionalized triphenylphosphoranylidene succinimides through a three-component reaction and DFT investigation of the reaction mechanism
Source: Royal Society of Chemistry journal article supplement (doi:10.1039/c4ra06913g), 2014-08-26
Supplement: c4ra06913g1.pdf [file c4ra06913g1.pdf]

## Electronic supplementary information

### A facile access to highly functionalized triphenylphosphoranylidene succinimides through a three-component reaction and DFT investigation on the reaction mechanism

Abbas Ali Esmacili<sup>a\*</sup>, Hanieh Khoddam-Mohammadi<sup>b</sup>, Abbas Moradi<sup>b</sup>, Ehsan Davamdar<sup>b</sup>,  
Mohammad Izadyar<sup>a</sup>, Mohammad Khavani<sup>a</sup> and Mohammad Reza Islami<sup>c</sup>

<sup>a</sup>Department of Chemistry, Ferdowsi University of Mashhad, Mashhad, Iran. E-mail: [abesmaeili@um.ac.ir](mailto:abesmaeili@um.ac.ir)

<sup>b</sup>Department of Chemistry, University of Birjand, P. O. Box 97175/615, Birjand, Iran.

<sup>c</sup>Department of Chemistry, Shahid Bahonar University, 76169, Kerman, Iran

|                                                                                                                                | Page |
|--------------------------------------------------------------------------------------------------------------------------------|------|
| <b>Figure S1.</b> Optimized structures for mechanism 2 in the gas phase by the B3LYP/6-31G(d) functional                       | 1    |
| <b>Figure S2.</b> Optimized structures for mechanism 4 in the gas phase by the B3LYP/6-31G(d) functional                       | 2    |
| <b>Figure S3.</b> Optimized TS structures for routes 2 and 4, respectively, in the gas phase by the B3LYP/6-31G(d) functional. | 2    |

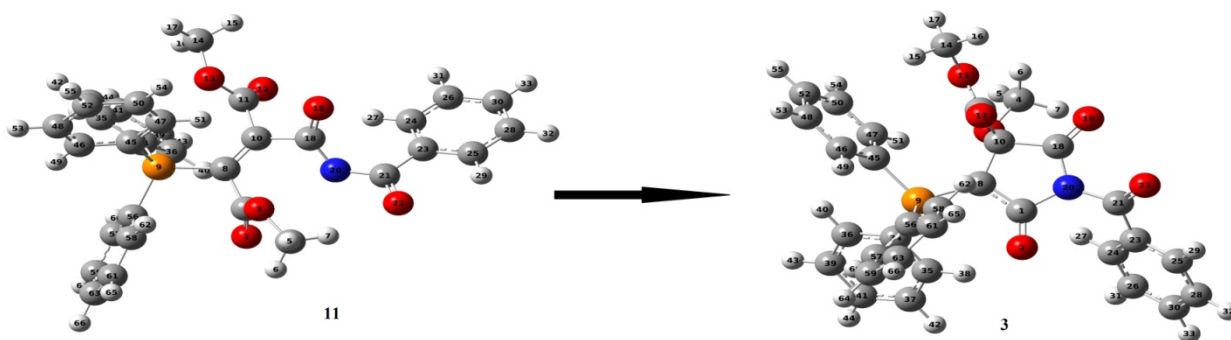

**Figure S1.** Optimized structures for mechanism 2 in the gas phase by the B3LYP/6-31G(d) functional

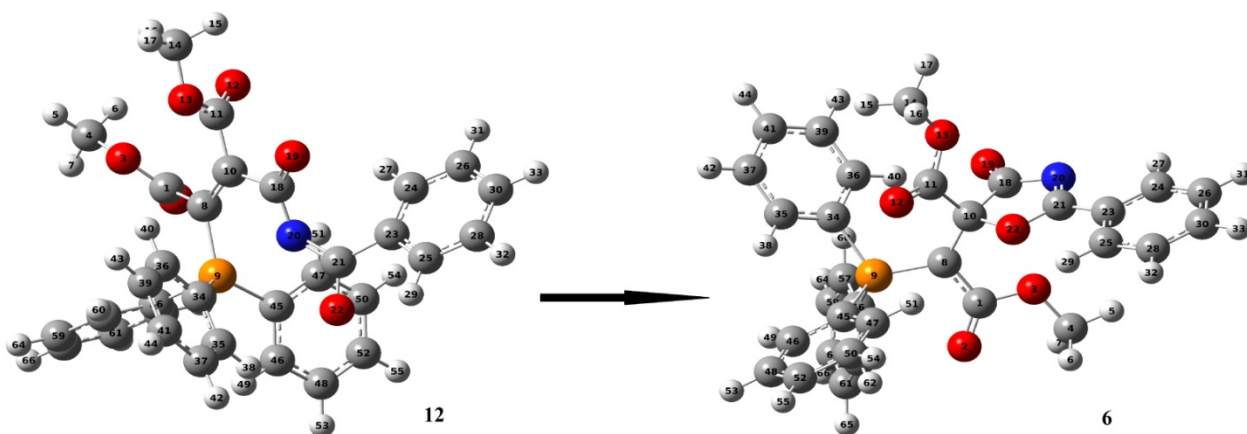

**Figure S2.** Optimized structures for mechanism 4 in the gas phase by the B3LYP/6-31G(d) functional

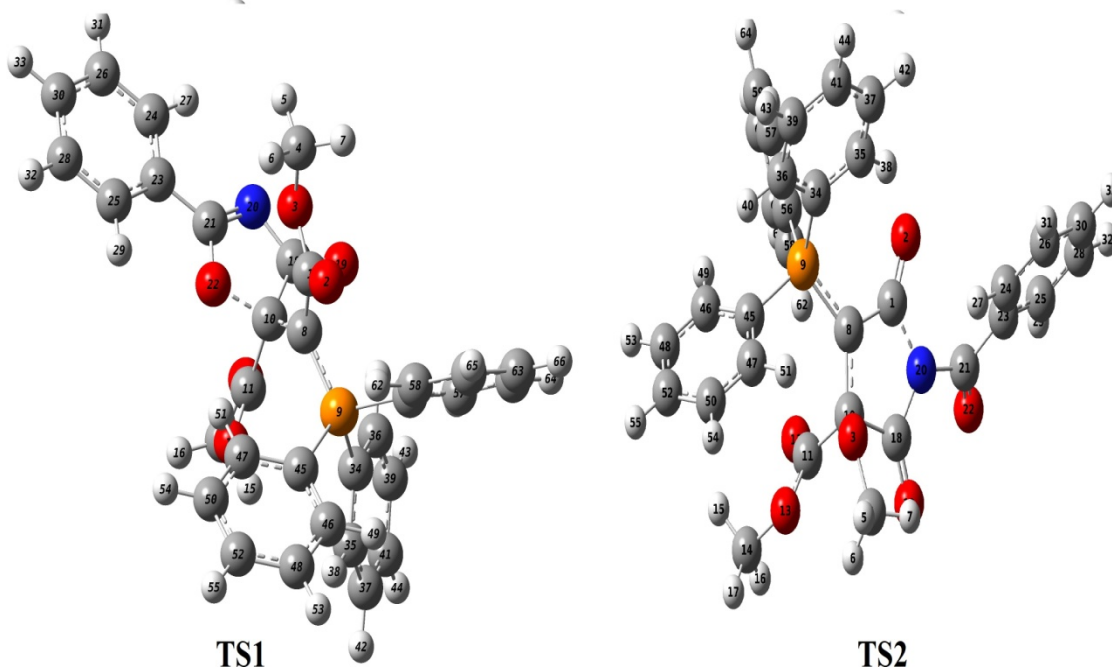

**Figure S3.** Optimized TS structures for routes 2 and 4, respectively, in the gas phase by the B3LYP/6-31G(d) functional.
